# Supplementary material for: Association of mSin1 with mTORC2 Ras and Akt reveals a crucial domain on mSin1 involved in Akt phosphorylation
Source: PubMed Central journal article supplement (PMC5609931; doi:10.18632/oncotarget.18818), 2017-06-28
Supplement: oncotarget-08-63392-s001.pdf [file oncotarget-08-63392-s001.pdf]

## Association of mSin1 with mTORC2 Ras and Akt reveals a crucial domain on mSin1 involved in Akt phosphorylation

### SUPPLEMENTARY MATERIALS

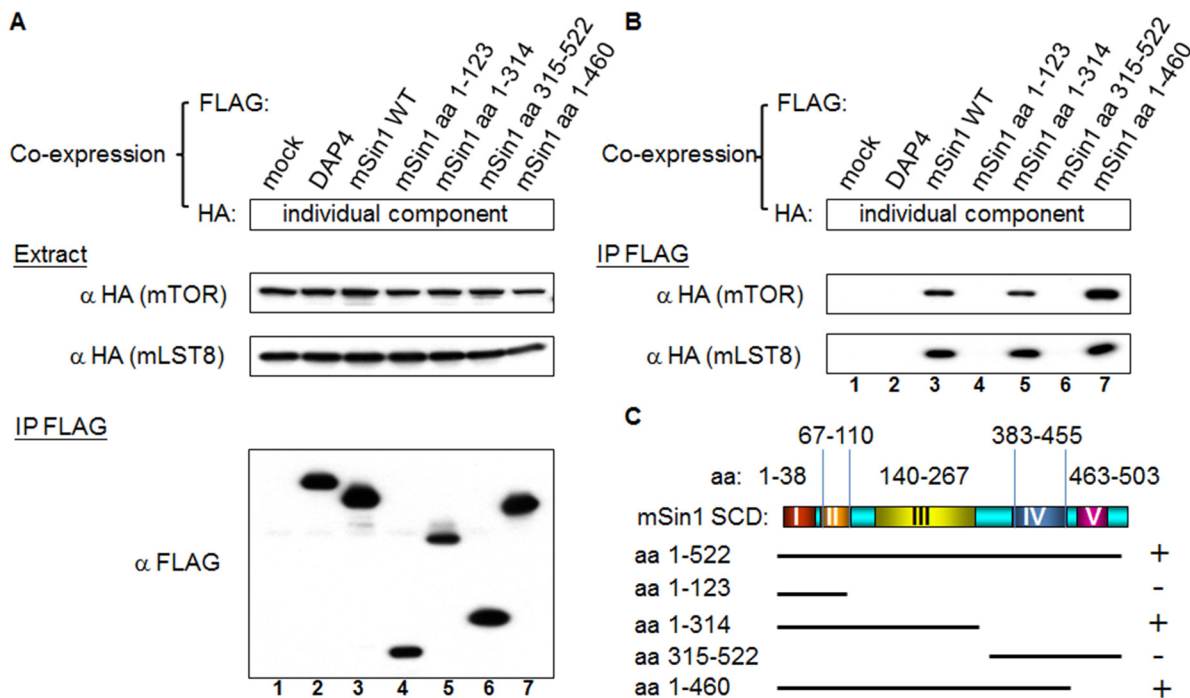

**Supplementary Figure 1: mTOR/mLST8 binds mSin1 aa 1-460 and aa 1-314, but not aa 1-123.** (A) HEK 293T cells were co-transfected with HA-mTOR/HA-mLST8 and the various indicated FLAG-mSin1 fragments. A portion of each extract was used to examine the expression level of the HA and FLAG tagged proteins. (B) The majority of each lysate was subjected to FLAG antibody IP. Anti-HA and anti-FLAG antibodies were used to detect the proteins in the total lysate and the associated proteins after the IP. (C) The binding between the various fragments of mSin1 and the recombinant HA proteins is summarized here. The recovery of the HA-mTOR and/or HA-mLST8 association is indicated on the right as either + or -. The blots are representative of one experiment repeated twice.

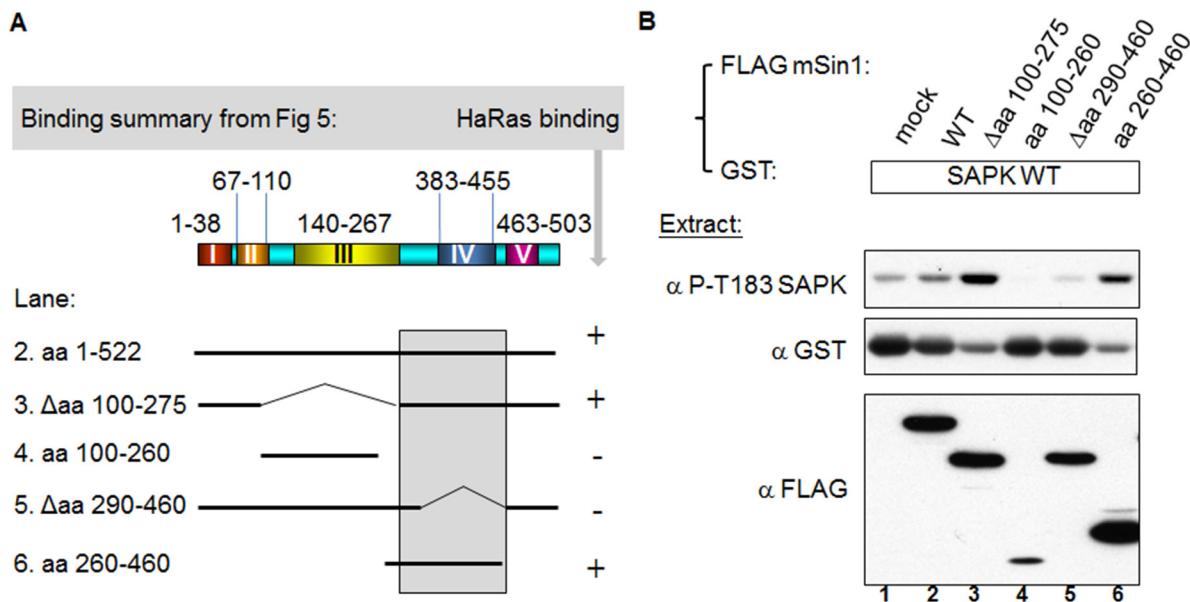

**Supplementary Figure 2: The mSin1 aa 260-460, namely the binding sites for HaRas, is necessary for phosphorylation of SAPK at the T183 site.** (A) The binding between the fragments of mSin1 and HaRas summarized from Figure 5 is simply used as a reference here. The recovery of these proteins, together with the mSin1 fragments, is indicated as either + or -. (B) HEK 293T cells were cotransfected with the various indicated FLAG-mSin1 fragments and GST-SAPK WT. Anti-phosphorylated SAPK T183 antibody was used to detect the functioning of these mSin1 fragments.
